# Supplementary material for: Proteotranscriptomics of ocular adnexal B-cell lymphoma reveals an oncogenic role of alternative splicing and identifies a diagnostic marker
Source: Springer Nature journal article supplement (doi:10.1186/s13046-022-02445-8), 2022-07-30

**Figure S4****A**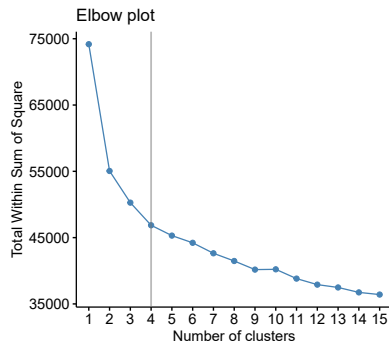**B**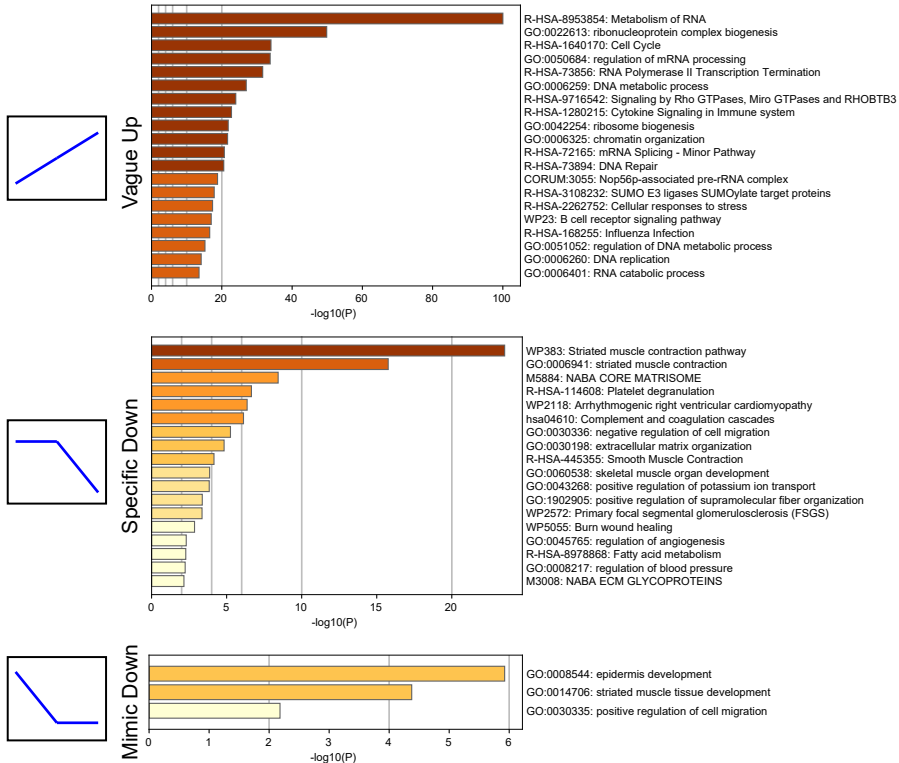

Supplement: MOESM5 [file 23320936]
