# Supplementary material for: Proteotranscriptomics of ocular adnexal B-cell lymphoma reveals an oncogenic role of alternative splicing and identifies a diagnostic marker
Source: J Exp Clin Cancer Res. 2022 Jul 30;41:234. doi: 10.1186/s13046-022-02445-8 (PMC9338531; doi:10.1186/s13046-022-02445-8)
Supplement: Supplementary file 16 — Additional file 16 : Table S9. Annotated splicing factors and regulators. [file 13046_2022_2445_MOESM16_ESM.csv]

	Eric L. Van Nostrand et al. Nature 2022		SpliceAid-F database
RBP name	Splicing regulation	Spliceosome	splice factor
ADAR	1	0
AKAP8L	1	0
AQR	0	1
BUD13	1	1
CCAR1	0	1
CCAR2	1	1
CCNL1	1	0
CDC40	1	1
CELF1	1	0
DAZAP1	1	0	1
DDX20	1	1
DDX42	0	1
DDX5	1	0
EFTUD2	1	1
ESRP1	1	0	1
EWSR1	1	0
FMR1	1	0	1
FUBP1	1	0
FUS	1	0	1
GEMIN5	1	1
GPKOW	1	1
HNRNPA1	1	0	1
HNRNPA2B1	1	0	1
HNRNPC	1	0	1
HNRNPD	1	0	1
HNRNPF	1	0	1
HNRNPH1	1	0	1
HNRNPH2	1	0	1
HNRNPK	1	0	1
HNRNPL	1	0	1
HNRNPLL	1	0
HNRNPM	1	0	1
HNRNPU	1	0	1
KHDRBS1	1	0	1
KHDRBS2	1	0	1
KHDRBS3	1	0	1
KHSRP	1	0	1
LSM4	1	1
MATR3	1	0
MBNL1	1	0	1
MSI1	1	0
NCBP2	1	0
NONO	1	0
NOVA1	1	0	1
PCBP1	1	0	1
PCBP2	1	0	1
PCBP3	1	0
PNN	1	0
PPIG	1	0
PPP1R8	1	0
PRPF4	0	1
PRPF6	1	1
PRPF8	1	1
PSIP1	1	0
PTBP1	1	0	1
PTBP3	1	0
PUF60	1	1
QKI	1	0	1
RAVER1	1	0
RBFOX2	1	0	1
RBFOX3	1	0
RBM14	1	0
RBM15	1	0
RBM15B	1	0
RBM17	1	1
RBM22	1	1
RBM23	1	0
RBM24	1	0
RBM25	1	1	1
RBM39	1	1
RBM4	1	0	1
RBM47	1	0
RBM5	1	1	1
RBM6	1	0
SART3	0	1
SF1	1	1	1
SF3A3	0	1
SF3B1	0	1	1
SF3B4	0	1
SFPQ	1	1	1
SMN1	1	1
SMNDC1	0	1
SND1	1	0
SNRNP200	0	1
SNRNP70	0	1
SNRPA	0	1
SRSF1	1	0
SRSF10	1	0
SRSF11	1	0
SRSF2	1	0
SRSF3	1	0
SRSF4	1	0
SRSF5	1	0
SRSF7	1	0
SRSF8	1	0
SRSF9	1	0
STAU1	1	0
SUGP2	1	0
SYNCRIP	1	0	1
TARDBP	1	0	1
TFIP11	1	1
TIA1	1	0	1
TIAL1	1	0	1
TRA2A	1	0	1
U2AF1	1	1
U2AF2	1	1
ZCRB1	0	1
ZNF326	1	0
ZRANB2	1	0	1
SAFB	1	0
AGO2	1	0
SFRS7			1
CUGBP1			1
CUGBP2			1
A2BP1			1
HNRNPA0			1
HNRPDL			1
HNRNPH3			1
HNRPLL			1
TRA2B			1
ELAVL2			1
ELAVL4			1
ELAVL1			1
NOVA2			1
PTBP2			1
SFRS2			1
SFRS1			1
SFRS3			1
SFRS9			1
SFRS13A			1
SFRS5			1
SFRS11			1
SFRS6			1
SFRS4			1
YBX1			1
ELAVL3			1
HNRNPA3			1
RBMX			1
SRRM1			1
ESRP2			1
